# Supplementary material
Source: Research Square preprint supplement (doi:10.21203/rs.3.rs-9585107/v1)
Supplement: Supplementary file 1 [file 2181640aa8ae348a4b27dde4.docx]

| 16 genes for DNA mutation detection | | | | | | | | | | |
| --- | --- | --- | --- | --- | --- | --- | --- | --- | --- | --- |
| AKT1 | EZH1 | | KRAS | SPOP | | BRAF | GNAS | | NRAS | TERT |
| CTNNB1 | HRAS | | PIK3CA | TP53 | | EIF1AX | TSHR | | RET | ZNF148 |
| 24 types of RNA fusion mutation detection | | | | | | | | | | |
| AFAPIL2_RET | | EML4_NTRK3 | | | KIAA1549_BRAF | | | SQSTM1_RET | | |
| CCDC186_RET | | IRF2BP2_NTRK1 | | | OSBPL9_BRAF | | | THADA_LOC389473 | | |
| EML4_ALK | | BRAF_OSBPL9 | | | SQSTM1_NTRK3 | | | NTRK1_TPM3 | | |
| GFPT¹_ALK | | CREB3L2_PPARG | | | THADA_IGF2BP3 | | | PRKAR1A_RET | | |
| AKAP9_BRAF | | ETV6_NTRK3 | | | NCOA4_RET | | | STRN_ALK | | |
| CCDC6_RET | | KIAA1217_RET | | | PAX8_PPARG | | | TPM3_NTRK1 | | |
