# Supplementary material
Source: Research Square preprint supplement (doi:10.21203/rs.3.rs-9585107/v1)
Supplement: Supplementary file 2 [file b1d446690ddc64deff991c50.pdf]

129kDa

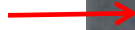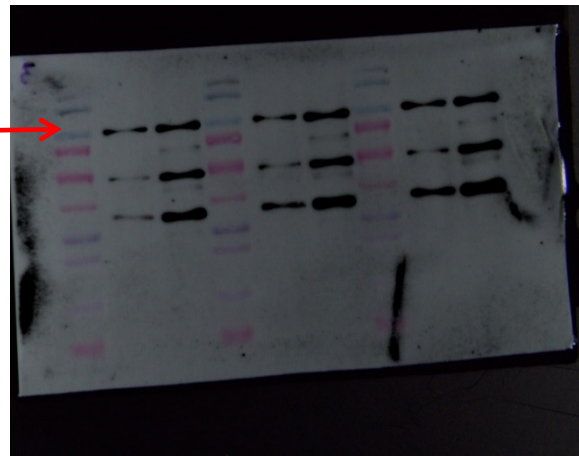

Full uncropped Gels and Blots image of Collagen I

37kDa

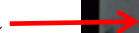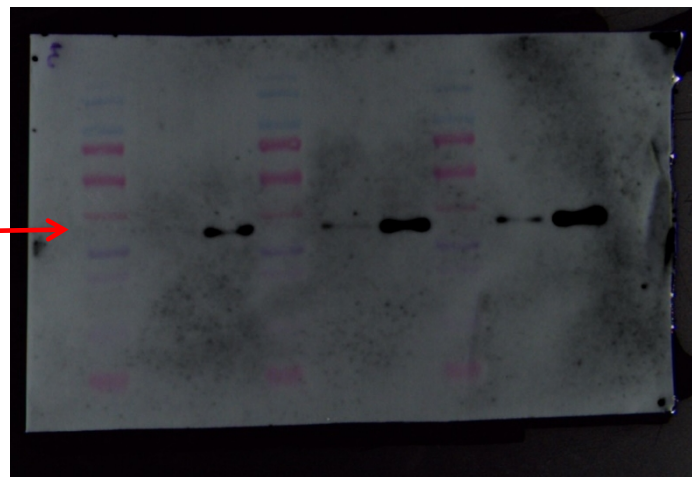

Full uncropped Gels and Blots image of TGF- $\beta$

88kDa

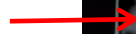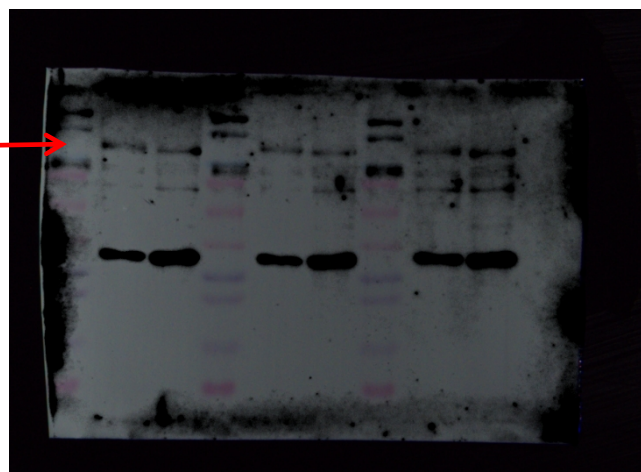

Full uncropped Gels and Blots image of ITGB5

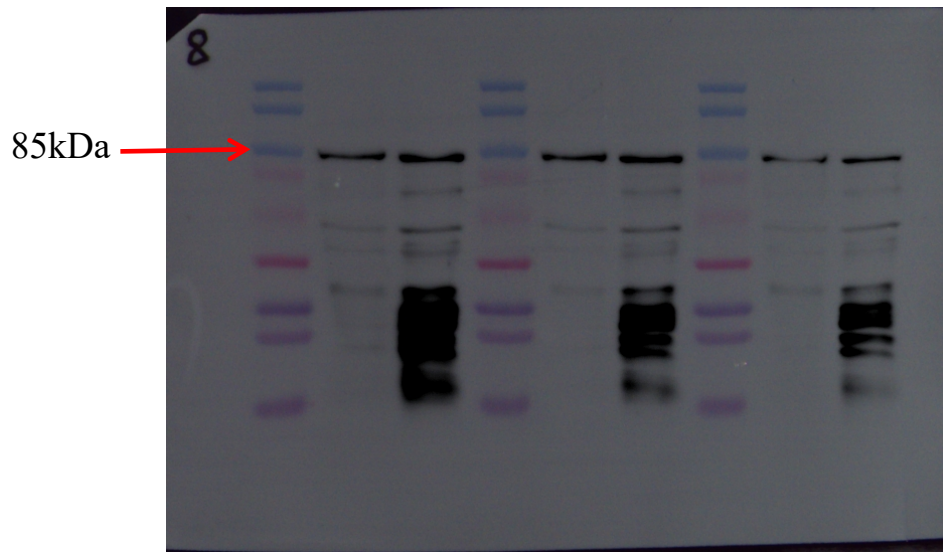

Full uncropped Gels and Blots image of POSTN

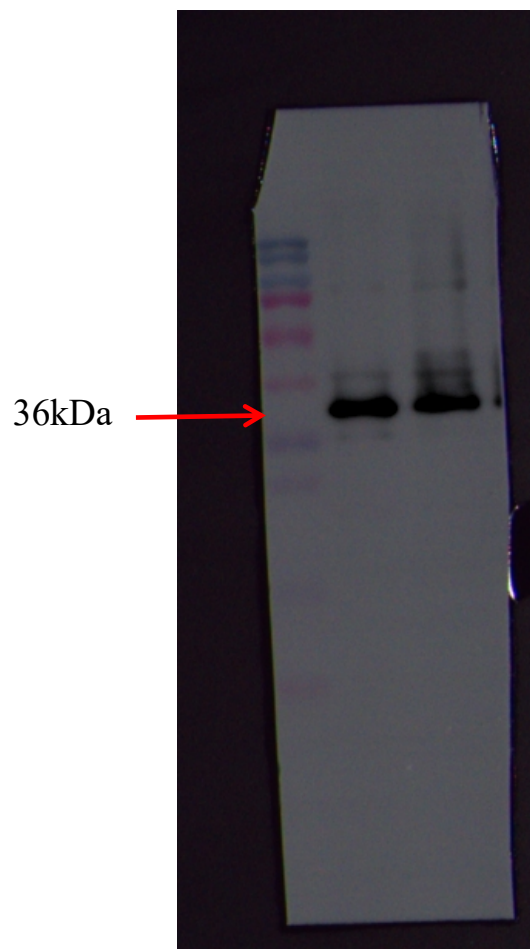

Full uncropped Gels and Blots image of GAPDH
